# Supplementary material for: Maternal Wellbeing Five Years after a Very Preterm Delivery: Prevalence and Influencing Factors in a European Cohort
Source: MDPI journal article supplement (doi:10.3390/children11010061), 2023-12-31
Supplement: s1 [file s1]

**Table S1:** Associations between MHI-5 scores and the different parental and child's characteristics (without multiple imputation).

| Multilevel multivariate linear regression*                        | A) Perinatal, neonatal and sociodemographic characteristics |              | B) Perinatal, neonatal, sociodemographic and child's health and developmental characteristics at five years** |              | C) Model b excluding the variables developmental delay, speech delay and ADHD (not available in France)*** |              |
|-------------------------------------------------------------------|-------------------------------------------------------------|--------------|---------------------------------------------------------------------------------------------------------------|--------------|------------------------------------------------------------------------------------------------------------|--------------|
|                                                                   | Coef.                                                       | [95% CI]     | Coef.                                                                                                         | [95% CI]     | Coef.                                                                                                      | [95% CI]     |
| <b>Perinatal and neonatal characteristics</b>                     |                                                             |              |                                                                                                               |              |                                                                                                            |              |
| <b>Parity</b>                                                     |                                                             |              |                                                                                                               |              |                                                                                                            |              |
| Zero                                                              | Ref.                                                        |              | Ref.                                                                                                          |              | Ref.                                                                                                       |              |
| One                                                               | -2.2                                                        | [-3.8; -0.7] | -2.5                                                                                                          | [-4.1; -1.0] | -2.2                                                                                                       | [-3.7; -0.8] |
| Two or more                                                       | -5.1                                                        | [-8.2; -2.0] | -5.4                                                                                                          | [-8.9; -1.9] | -5.0                                                                                                       | [-8.2; -1.9] |
| <b>Antepartum haemorrhage after week 20</b>                       |                                                             |              |                                                                                                               |              |                                                                                                            |              |
| No                                                                | Ref.                                                        |              | Ref.                                                                                                          |              | Ref.                                                                                                       |              |
| Yes                                                               | 0.0                                                         | [-2.1; 2.1]  | 0.2                                                                                                           | [-2.4; 2.8]  | 0.2                                                                                                        | [-1.9; 2.4]  |
| <b>Admission for preterm labor or contractions after week 20</b>  |                                                             |              |                                                                                                               |              |                                                                                                            |              |
| No                                                                | Ref.                                                        |              | Ref.                                                                                                          |              | Ref.                                                                                                       |              |
| Yes                                                               | 1.0                                                         | [-0.6; 2.5]  | 0.9                                                                                                           | [-0.9; 2.6]  | 0.9                                                                                                        | [-1.9; 2.4]  |
| <b>Mother has one of preeclampsia, eclampsia or HELLP syndrom</b> |                                                             |              |                                                                                                               |              |                                                                                                            |              |
| No                                                                | Ref.                                                        |              | Ref.                                                                                                          |              | Ref.                                                                                                       |              |
| Yes                                                               | 0.5                                                         | [-1.5; 2.6]  | 0.9                                                                                                           | [-1.2; 3.0]  | 0.3                                                                                                        | [-1.7; 2.4]  |
| <b>Preterm premature rupture of membranes</b>                     |                                                             |              |                                                                                                               |              |                                                                                                            |              |
| No                                                                | Ref.                                                        |              | Ref.                                                                                                          |              | Ref.                                                                                                       |              |
| Yes                                                               | -0.6                                                        | [-2.0; 0.9]  | -0.6                                                                                                          | [-2.6; 1.4]  | -0.7                                                                                                       | [-2.4; 1.0]  |
| <b>Multiples</b>                                                  |                                                             |              |                                                                                                               |              |                                                                                                            |              |

| Multilevel multivariate linear regression*                                          | A) Perinatal, neonatal and sociodemographic characteristics |             | B) Perinatal, neonatal, sociodemographic and child's health and developmental characteristics at five years** |             | C) Model b excluding the variables developmental delay, speech delay and ADHD (not available in France)*** |             |
|-------------------------------------------------------------------------------------|-------------------------------------------------------------|-------------|---------------------------------------------------------------------------------------------------------------|-------------|------------------------------------------------------------------------------------------------------------|-------------|
|                                                                                     | Coef.                                                       | [95% CI]    | Coef.                                                                                                         | [95% CI]    | Coef.                                                                                                      | [95% CI]    |
| Singleton                                                                           | Ref.                                                        |             | Ref.                                                                                                          |             | Ref.                                                                                                       |             |
| Multiples no death                                                                  | -1.7                                                        | [-3.4; 0.1] | -1.7                                                                                                          | [-3.8; 0.3] | -1.5                                                                                                       | [-3.5; 0.5] |
| <b>Sex of the baby</b>                                                              |                                                             |             |                                                                                                               |             |                                                                                                            |             |
| Male                                                                                | Ref.                                                        |             | Ref.                                                                                                          |             | Ref.                                                                                                       |             |
| Female                                                                              | 0.4                                                         | [-1.0; 1.7] | -0.2                                                                                                          | [-1.5; 1.2] | 0.2                                                                                                        | [-1.0; 1.5] |
| <b>Gestational age</b>                                                              |                                                             |             |                                                                                                               |             |                                                                                                            |             |
| ≤25 weeks                                                                           | 1.5                                                         | [-1.0; 4.0] | 2.5                                                                                                           | [-0.7; 5.6] | 1.8                                                                                                        | [-0.8; 4.4] |
| 26–27 weeks                                                                         | -0.2                                                        | [-2.4; 2.1] | 0.6                                                                                                           | [-1.6; 2.8] | -0.2                                                                                                       | [-2.4; 2.1] |
| 28–29 weeks                                                                         | 1.1                                                         | [-0.3; 2.5] | 1.6                                                                                                           | [0.2; 3.0]  | 1.1                                                                                                        | [-0.3; 2.5] |
| 30–31 weeks                                                                         | Ref.                                                        |             | Ref.                                                                                                          |             | Ref.                                                                                                       |             |
| <b>Small for gestational age</b>                                                    |                                                             |             |                                                                                                               |             |                                                                                                            |             |
| <3rd percentile                                                                     | 0.3                                                         | [-2.7; 3.2] | -0.0                                                                                                          | [-3.0; 3.0] | 0.2                                                                                                        | [-2.7; 3.0] |
| 3rd–9th percentile                                                                  | Ref.                                                        |             | Ref.                                                                                                          |             | Ref.                                                                                                       |             |
| ≥10th percentile                                                                    | -0.3                                                        | [-2.4; 1.8] | -0.3                                                                                                          | [-2.6; 1.9] | -0.3                                                                                                       | [-2.4; 1.8] |
| <b>At least one child had a BPD</b>                                                 |                                                             |             |                                                                                                               |             |                                                                                                            |             |
| No                                                                                  | Ref.                                                        |             | Ref.                                                                                                          |             | Ref.                                                                                                       |             |
| Yes                                                                                 | -0.3                                                        | [-2.4; 1.8] | 1.0                                                                                                           | [-1.0; 3.0] | -0.0                                                                                                       | [-2.0; 1.9] |
| <b>At least one child had a congenital anomaly</b>                                  |                                                             |             |                                                                                                               |             |                                                                                                            |             |
| No                                                                                  | Ref.                                                        |             | Ref.                                                                                                          |             | Ref.                                                                                                       |             |
| Yes                                                                                 | 0.2                                                         | [-2.6; 3.0] | 2.3                                                                                                           | [0.3; 4.4]  | 0.7                                                                                                        | [-2.1; 3.5] |
| <b>At least one child had any severe non-respiratory morbidity at discharge****</b> |                                                             |             |                                                                                                               |             |                                                                                                            |             |
| No                                                                                  | Ref.                                                        |             | Ref.                                                                                                          |             | Ref.                                                                                                       |             |

| Multilevel multivariate linear regression*                            | A) Perinatal, neonatal and sociodemographic characteristics |              | B) Perinatal, neonatal, sociodemographic and child's health and developmental characteristics at five years** |              | C) Model b excluding the variables developmental delay, speech delay and ADHD (not available in France)*** |              |
|-----------------------------------------------------------------------|-------------------------------------------------------------|--------------|---------------------------------------------------------------------------------------------------------------|--------------|------------------------------------------------------------------------------------------------------------|--------------|
|                                                                       | Coef.                                                       | [95% CI]     | Coef.                                                                                                         | [95% CI]     | Coef.                                                                                                      | [95% CI]     |
| Yes                                                                   | -4.0                                                        | [-7.0; -0.9] | -3.5                                                                                                          | [-6.2; -0.7] | -2.7                                                                                                       | [-6.1; 0.7]  |
| <b>Sociodemographic characteristics</b>                               |                                                             |              |                                                                                                               |              |                                                                                                            |              |
| <b>Maternal age at childbirth</b>                                     |                                                             |              |                                                                                                               |              |                                                                                                            |              |
| <25 years                                                             | -1.4                                                        | [-3.2; 0.3]  | -1.6                                                                                                          | [-3.3; 0.2]  | -1.3                                                                                                       | [-3.0; 0.3]  |
| 25–34 years                                                           | Ref.                                                        |              | Ref.                                                                                                          |              | Ref.                                                                                                       |              |
| ≥35 years                                                             | -1.3                                                        | [-3.2; 0.6]  | -1.0                                                                                                          | [-3.0; 0.9]  | -1.4                                                                                                       | [-3.2; 0.5]  |
| <b>Maternal country of birth</b>                                      |                                                             |              |                                                                                                               |              |                                                                                                            |              |
| Native born                                                           | Ref.                                                        |              | Ref.                                                                                                          |              | Ref.                                                                                                       |              |
| Other European country                                                | -0.8                                                        | [-4.1; 2.4]  | -0.5                                                                                                          | [-3.6; 2.6]  | -1.2                                                                                                       | [-4.4; 2.0]  |
| Non-European country                                                  | -1.3                                                        | [-3.7; 1.1]  | -0.8                                                                                                          | [-3.9; 2.4]  | -1.5                                                                                                       | [-4.1; 1.0]  |
| <b>Maternal educational level</b>                                     |                                                             |              |                                                                                                               |              |                                                                                                            |              |
| Low (ISCED 0-2)                                                       | -1.3                                                        | [-3.6; 1.0]  | -1.9                                                                                                          | [-4.5; 0.7]  | -1.3                                                                                                       | [-3.5; 1.0]  |
| Intermediate (ISCED 3-5)                                              | Ref.                                                        |              | Ref.                                                                                                          |              | Ref.                                                                                                       |              |
| High (ISCED 6-8)                                                      | 0.0                                                         | [-1.3; 1.4]  | -0.5                                                                                                          | [-2.0; 1.0]  | -0.0                                                                                                       | [-1.4; 1.3]  |
| <b>Parental cohabiting status</b>                                     |                                                             |              |                                                                                                               |              |                                                                                                            |              |
| Single/Other                                                          | -5.9                                                        | [-8.9; -2.9] | -5.7                                                                                                          | [-8.8; -2.6] | -5.7                                                                                                       | [-8.4; -2.9] |
| Married/Couple/Cohabiting                                             | Ref.                                                        |              | Ref.                                                                                                          |              | Ref.                                                                                                       |              |
| <b>Household unemployment situation</b>                               |                                                             |              |                                                                                                               |              |                                                                                                            |              |
| Employed (part-/fulltime)/Other****                                   | Ref.                                                        |              | Ref.                                                                                                          |              | Ref.                                                                                                       |              |
| At least one parent unemployed                                        | -1.7                                                        | [-2.8; -0.6] | -1.4                                                                                                          | [-2.8; -0.0] | -1.7                                                                                                       | [-2.8; -0.6] |
| <b>Child's health and developmental characteristics at five years</b> |                                                             |              |                                                                                                               |              |                                                                                                            |              |
| <b>Sensory impairment</b>                                             |                                                             |              |                                                                                                               |              |                                                                                                            |              |

| Multilevel multivariate linear regression*           | A) Perinatal, neonatal and sociodemographic characteristics |          | B) Perinatal, neonatal, sociodemographic and child's health and developmental characteristics at five years** |              | C) Model b excluding the variables developmental delay, speech delay and ADHD (not available in France)*** |               |
|------------------------------------------------------|-------------------------------------------------------------|----------|---------------------------------------------------------------------------------------------------------------|--------------|------------------------------------------------------------------------------------------------------------|---------------|
|                                                      | Coef.                                                       | [95% CI] | Coef.                                                                                                         | [95% CI]     | Coef.                                                                                                      | [95% CI]      |
| None/mild                                            |                                                             |          | Ref.                                                                                                          |              | Ref.                                                                                                       |               |
| Moderate/severe                                      |                                                             |          | -4.3                                                                                                          | [-7.7; -0.9] | -6.6                                                                                                       | [-9.7; -3.5]  |
| <b>Cerebral palsy</b>                                |                                                             |          |                                                                                                               |              |                                                                                                            |               |
| No                                                   |                                                             |          | Ref.                                                                                                          |              | Ref.                                                                                                       |               |
| Yes                                                  |                                                             |          | 1.1                                                                                                           | [-1.1; 3.4]  | -1.4                                                                                                       | [-3.8; 1.1]   |
| <b>Autism</b>                                        |                                                             |          |                                                                                                               |              |                                                                                                            |               |
| No                                                   |                                                             |          | Ref.                                                                                                          |              | Ref.                                                                                                       |               |
| Yes                                                  |                                                             |          | -4.6                                                                                                          | [-10.2; 1.0] | -6.2                                                                                                       | [-10.3; -2.1] |
| <b>Epilepsy</b>                                      |                                                             |          |                                                                                                               |              |                                                                                                            |               |
| No                                                   |                                                             |          | Ref.                                                                                                          |              | Ref.                                                                                                       |               |
| Yes                                                  |                                                             |          | -1.9                                                                                                          | [-5.4; 1.6]  | 1.8                                                                                                        | [-4.5; 8.2]   |
| <b>Developmental delay</b>                           |                                                             |          |                                                                                                               |              |                                                                                                            |               |
| No                                                   |                                                             |          | Ref.                                                                                                          |              |                                                                                                            |               |
| Yes                                                  |                                                             |          | -4.1                                                                                                          | [-8.1; -0.1] |                                                                                                            |               |
| <b>Speech delay</b>                                  |                                                             |          |                                                                                                               |              |                                                                                                            |               |
| No                                                   |                                                             |          | Ref.                                                                                                          |              |                                                                                                            |               |
| Yes                                                  |                                                             |          | -0.9                                                                                                          | [-6.5; 4.7]  |                                                                                                            |               |
| <b>ADHD</b>                                          |                                                             |          |                                                                                                               |              |                                                                                                            |               |
| No                                                   |                                                             |          | Ref.                                                                                                          |              |                                                                                                            |               |
| Yes                                                  |                                                             |          | -4.9                                                                                                          | [-9.7; 0.0]  |                                                                                                            |               |
| <b>At least one of developmental or speech delay</b> |                                                             |          |                                                                                                               |              |                                                                                                            |               |
| No                                                   |                                                             |          | Ref.                                                                                                          |              |                                                                                                            |               |

| Multilevel multivariate linear regression* | A) Perinatal, neonatal and sociodemographic characteristics |          | B) Perinatal, neonatal, sociodemographic and child's health and developmental characteristics at five years** |             | C) Model b excluding the variables developmental delay, speech delay and ADHD (not available in France)*** |          |
|--------------------------------------------|-------------------------------------------------------------|----------|---------------------------------------------------------------------------------------------------------------|-------------|------------------------------------------------------------------------------------------------------------|----------|
|                                            | Coef.                                                       | [95% CI] | Coef.                                                                                                         | [95% CI]    | Coef.                                                                                                      | [95% CI] |
| Yes                                        |                                                             |          | -0.8                                                                                                          | [-6.7; 5.1] |                                                                                                            |          |

Abbreviations: ISCED, International Standard Classification of Education. HELLP, Hemolysis, Elevated Liver enzymes, and Low Platelets. BPD, bronchopulmonary dysplasia. ADHD, attention deficit hyperactivity disorder. \* with IPW; \*\* without France; \*\*\* with France; \*\*\*\* defined as at least one of intraventricular haemorrhage grade III or IV, cystic periventricular leukomalacia, ROP stages III to V, or necrotising enterocolitis requiring surgery or peritoneal drainage; \*\*\*\*\* other situations included student, parental leave, home parents, and other.

**Table S2:** Associations between MHI-5 scores and the different parental and child's characteristics among children born extremely preterm only (column A) and using data from the whole sample and without three variables not available in France (column B).

| Multilevel multivariate linear regression*                        | A) Extremely preterm,<br>without France ** |              | B) Extremely preterm,<br>whole sample *** |              |
|-------------------------------------------------------------------|--------------------------------------------|--------------|-------------------------------------------|--------------|
|                                                                   | Coef.                                      | [95% CI]     | Coef.                                     | [95% CI]     |
| <b>Perinatal and neonatal characteristics</b>                     |                                            |              |                                           |              |
| <b>Parity</b>                                                     |                                            |              |                                           |              |
| Zero                                                              | Ref.                                       |              | Ref.                                      |              |
| One                                                               | -4.2                                       | [-6.8; -1.7] | -3.8                                      | [-6.1; -1.4] |
| Two or more                                                       | -3.5                                       | [-9.7; 2.6]  | -3.9                                      | [-9.0; -1.1] |
| <b>Antepartum haemorrhage after week 20</b>                       |                                            |              |                                           |              |
| No                                                                | Ref.                                       |              | Ref.                                      |              |
| Yes                                                               | 1.2                                        | [-1.8; 4.3]  | 0.2                                       | [-1.9; 2.4]  |
| <b>Admission for preterm labor or contractions after week 20</b>  |                                            |              |                                           |              |
| No                                                                | Ref.                                       |              | Ref.                                      |              |
| Yes                                                               | 4.5                                        | [1.6; 7.5]   | 4.0                                       | [1.1; 6.9]   |
| <b>Mother has one of preeclampsia, eclampsia or HELLP syndrom</b> |                                            |              |                                           |              |
| No                                                                | Ref.                                       |              | Ref.                                      |              |
| Yes                                                               | 2.0                                        | [-1.7; 5.7]  | 1.7                                       | [-1.7; 5.2]  |
| <b>Preterm premature rupture of membranes</b>                     |                                            |              |                                           |              |
| No                                                                | Ref.                                       |              | Ref.                                      |              |
| Yes                                                               | -1.8                                       | [-3.9; 0.3]  | -1.7                                      | [-3.5; 0.2]  |
| <b>Multiples</b>                                                  |                                            |              |                                           |              |
| Singleton                                                         | Ref.                                       |              | Ref.                                      |              |
| Mutliplies no death                                               | 1.5                                        | [-2.3; 5.3]  | 0.5                                       | [-3.4; 4.5]  |
| <b>Sex of the baby</b>                                            |                                            |              |                                           |              |
| Male                                                              | Ref.                                       |              | Ref.                                      |              |
| Female                                                            | 0.4                                        | [-2.7; 3.5]  | 0.4                                       | [-2.3; 3.1]  |
| <b>Gestational age</b>                                            |                                            |              |                                           |              |
| ≤25 weeks                                                         | 1.6                                        | [-0.5; 3.7]  | 1.8                                       | [-0.0; 3.7]  |
| 26–27 weeks                                                       | Ref.                                       |              | Ref.                                      |              |
| <b>Small for gestational age</b>                                  |                                            |              |                                           |              |
| <3rd percentile                                                   | -0.1                                       | [-3.4; 3.1]  | -0.6                                      | [-3.9; 2.6]  |
| 3rd–9th percentile                                                | Ref.                                       |              | Ref.                                      |              |
| ≥10th percentile                                                  | -1.1                                       | [-3.9; 1.7]  | -0.2                                      | [-4.3; 3.9]  |
| <b>At least one child had a BPD</b>                               |                                            |              |                                           |              |
| No                                                                | Ref.                                       |              | Ref.                                      |              |
| Yes                                                               | -0.6                                       | [-3.5; 2.2]  | -0.8                                      | [-3.7; 2.1]  |
| <b>At least one child had a congenital anomaly</b>                |                                            |              |                                           |              |
| No                                                                | Ref.                                       |              | Ref.                                      |              |
| Yes                                                               | 1.7                                        | [-3.6; 7.1]  | 0.4                                       | [-4.8; 5.6]  |

| Multilevel multivariate linear regression*                                          | A) Extremely preterm,<br>without France ** |               | B) Extremely preterm,<br>whole sample *** |               |
|-------------------------------------------------------------------------------------|--------------------------------------------|---------------|-------------------------------------------|---------------|
|                                                                                     | Coef.                                      | [95% CI]      | Coef.                                     | [95% CI]      |
| <b>At least one child had any severe non-respiratory morbidity at discharge****</b> |                                            |               |                                           |               |
| No                                                                                  | Ref.                                       |               | Ref.                                      |               |
| Yes                                                                                 | -0.6                                       | [-2.7; 1.5]   | -0.3                                      | [-2.4; 1.9]   |
| <b>Sociodemographic characteristics</b>                                             |                                            |               |                                           |               |
| <b>Maternal age at childbirth</b>                                                   |                                            |               |                                           |               |
| <25 years                                                                           | 0.7                                        | [-5.9; 7.4]   | 0.1                                       | [-5.3; 5.5]   |
| 25–34 years                                                                         | Ref.                                       |               | Ref.                                      |               |
| ≥35 years                                                                           | -1.2                                       | [-4.4; 1.9]   | -1.3                                      | [-3.7; 1.1]   |
| <b>Maternal country of birth</b>                                                    |                                            |               |                                           |               |
| Native born                                                                         | Ref.                                       |               | Ref.                                      |               |
| Other European country                                                              | -0.8                                       | [-7.0; 5.4]   | -1.1                                      | [-7.7; 5.5]   |
| Non-European country                                                                | 4.1                                        | [-1.1; 9.3]   | 1.8                                       | [-4.2; 7.8]   |
| <b>Maternal educational level</b>                                                   |                                            |               |                                           |               |
| Low (ISCED 0-2)                                                                     | -4.3                                       | [-7.7; 0.9]   | -2.4                                      | [-5.8; 1.1]   |
| Intermediate (ISCED 3-5)                                                            | Ref.                                       |               | Ref.                                      |               |
| High (ISCED 6-8)                                                                    | -1.6                                       | [-5.0; 1.8]   | -1.7                                      | [-4.7; 1.3]   |
| <b>Parental cohabiting status</b>                                                   |                                            |               |                                           |               |
| Single/Other                                                                        | -7.3                                       | [-10.4; -4.1] | -7.5                                      | [-10.4; -4.5] |
| Married/Couple/Cohabiting                                                           | Ref.                                       |               | Ref.                                      |               |
| <b>Household unemployment situation</b>                                             |                                            |               |                                           |               |
| Employed (part-/fulltime)/Other*****                                                | Ref.                                       |               | Ref.                                      |               |
| At least one parent unemployed                                                      | -2.7                                       | [-6.4; 1.0]   | -2.7                                      | [-5.8; 0.4]   |
| <b>Child's health and developmental characteristics at five years</b>               |                                            |               |                                           |               |
| <b>Sensory impairment</b>                                                           |                                            |               |                                           |               |
| None/mild                                                                           | Ref.                                       |               | Ref.                                      |               |
| Moderate/severe                                                                     | -12.1                                      | [-17.6; -6.7] | -11.1                                     | [-16.8; -5.4] |
| <b>Cerebral palsy</b>                                                               |                                            |               |                                           |               |
| No                                                                                  | Ref.                                       |               | Ref.                                      |               |
| Yes                                                                                 | -3.0                                       | [-6.3; 0.4]   | -3.4                                      | [-5.7; -1.0]  |
| <b>Autism</b>                                                                       |                                            |               |                                           |               |
| No                                                                                  | Ref.                                       |               | Ref.                                      |               |
| Yes                                                                                 | -12.4                                      | [-20.3; -4.5] | -12.2                                     | [-19.4; -5.0] |
| <b>Epilepsy</b>                                                                     |                                            |               |                                           |               |
| No                                                                                  | Ref.                                       |               | Ref.                                      |               |
| Yes                                                                                 | -2.3                                       | [-7.5; 2.9]   | -3.5                                      | [-8.3; 1.3]   |
| <b>Developmental delay</b>                                                          |                                            |               |                                           |               |
| No                                                                                  | Ref.                                       |               |                                           |               |
| Yes                                                                                 | -3.1                                       | [-9.1; 2.9]   |                                           |               |
| <b>Speech delay</b>                                                                 |                                            |               |                                           |               |
| No                                                                                  | Ref.                                       |               |                                           |               |

| Multilevel multivariate linear regression*                        | A) Extremely preterm,<br>without France ** |              | B) Extremely preterm,<br>whole sample *** |              |
|-------------------------------------------------------------------|--------------------------------------------|--------------|-------------------------------------------|--------------|
|                                                                   | Coef.                                      | [95% CI]     | Coef.                                     | [95% CI]     |
| Yes                                                               | -2.3                                       | [-7.9; 3.3]  |                                           |              |
| <b>ADHD</b>                                                       |                                            |              |                                           |              |
| No                                                                | Ref.                                       |              |                                           |              |
| Yes                                                               | -3.4                                       | [-6.9; 0.0]  |                                           |              |
| <b>At least one of developmental or speech delay</b>              |                                            |              |                                           |              |
| No                                                                | Ref.                                       |              |                                           |              |
| Yes                                                               | 1.3                                        | [-6.7; 9.3]  |                                           |              |
| <b>Motor impairment (MABC-2 score ≤5<sup>th</sup> percentile)</b> |                                            |              |                                           |              |
| No                                                                | Ref.                                       |              | Ref.                                      |              |
| Yes                                                               | -0.2                                       | [-2.7; 2.4]  | -1.1                                      | [-3.6; 1.4]  |
| <b>Cognitive impairment (IQ &lt;70)</b>                           |                                            |              |                                           |              |
| None/mild                                                         | Ref.                                       |              | Ref.                                      |              |
| Moderate/severe                                                   | -4.1                                       | [-7.0; -1.2] | -6.1                                      | [-9.3; -2.9] |

Abbreviations: BPD, bronchopulmonary dysplasia. ADHD, attention deficit hyperactivity disorder. EPT, extremely preterm. MABC-2, Movement Assessment Battery for Children – 2nd Edition. IQ, (full-scale) intelligence quotient. \* with IPW; \*\* Model adjusted for perinatal, neonatal, sociodemographic and child's health and developmental characteristics at five years, without France; \*\*\* Model adjusted for perinatal, neonatal, sociodemographic and child's health and developmental characteristics at five years, with France; \*\*\*\* defined as at least one of intraventricular haemorrhage grade III or IV, cystic periventricular leukomalacia, ROP stages III to V, or necrotising enterocolitis requiring surgery or peritoneal drainage; \*\*\*\*\* other situations included student, parental leave, home parents, and other.

**Table S3:** Associations between MHI-5 scores and the different parental and child's characteristics excluding 89 mothers with at least one child dead before 2 years of age (n=2,516) and using data from the whole sample (column A) and without three variables not available in France (column B).

| Multilevel multivariate linear regression*                        | A) Excluding 89 mothers<br>with at least one child dead<br>before two years of age,<br>whole sample ** |              | B) Excluding 89 mothers<br>with at least one child dead<br>before two years of age,<br>without France *** |              |
|-------------------------------------------------------------------|--------------------------------------------------------------------------------------------------------|--------------|-----------------------------------------------------------------------------------------------------------|--------------|
|                                                                   | Coef.                                                                                                  | [95% CI]     | Coef.                                                                                                     | [95% CI]     |
| <b>Perinatal and neonatal characteristics</b>                     |                                                                                                        |              |                                                                                                           |              |
| <b>Parity</b>                                                     |                                                                                                        |              |                                                                                                           |              |
| Zero                                                              | Ref.                                                                                                   |              | Ref.                                                                                                      |              |
| One                                                               | -2.3                                                                                                   | [-3.7; -0.9] | -1.5                                                                                                      | [-2.8; -0.1] |
| Two or more                                                       | -4.9                                                                                                   | [-7.7; -2.0] | -3.9                                                                                                      | [-5.7; -2.1] |
| <b>Antepartum haemorrhage after week 20</b>                       |                                                                                                        |              |                                                                                                           |              |
| No                                                                | Ref.                                                                                                   |              | Ref.                                                                                                      |              |
| Yes                                                               | 0.3                                                                                                    | [-1.8; 2.4]  | -0.3                                                                                                      | [-1.8; 1.3]  |
| <b>Admission for preterm labor or contractions after week 20</b>  |                                                                                                        |              |                                                                                                           |              |
| No                                                                | Ref.                                                                                                   |              | Ref.                                                                                                      |              |
| Yes                                                               | 1.1                                                                                                    | [-0.5; 2.7]  | 1.1                                                                                                       | [-0.2; 2.4]  |
| <b>Mother has one of preeclampsia, eclampsia or HELLP syndrom</b> |                                                                                                        |              |                                                                                                           |              |
| No                                                                | Ref.                                                                                                   |              | Ref.                                                                                                      |              |
| Yes                                                               | 0.7                                                                                                    | [-1.3; 2.8]  | -0.5                                                                                                      | [-2.3; 1.2]  |
| <b>Preterm premature rupture of membranes</b>                     |                                                                                                        |              |                                                                                                           |              |
| No                                                                | Ref.                                                                                                   |              | Ref.                                                                                                      |              |
| Yes                                                               | -0.7                                                                                                   | [-2.4; 1.0]  | -1.2                                                                                                      | [-2.6; 0.2]  |
| <b>Multiples</b>                                                  |                                                                                                        |              |                                                                                                           |              |
| Singleton                                                         | Ref.                                                                                                   |              | Ref.                                                                                                      |              |
| Multiples no death                                                | -1.4                                                                                                   | [-3.2; 0.4]  | -1.7                                                                                                      | [-3.0; -0.4] |
| <b>Sex of the baby</b>                                            |                                                                                                        |              |                                                                                                           |              |
| Male                                                              | Ref.                                                                                                   |              | Ref.                                                                                                      |              |
| Female                                                            | 0.3                                                                                                    | [-1.0; 1.6]  | 0.5                                                                                                       | [-0.6; 1.7]  |
| <b>Gestational age</b>                                            |                                                                                                        |              |                                                                                                           |              |
| ≤25 weeks                                                         | 1.4                                                                                                    | [-1.5; 4.3]  | 1.5                                                                                                       | [-1.0; 4.0]  |
| 26–27 weeks                                                       | -0.3                                                                                                   | [-2.4; 1.8]  | -1.1                                                                                                      | [-2.8; 0.6]  |
| 28–29 weeks                                                       | 1.0                                                                                                    | [-0.3; 2.4]  | 0.5                                                                                                       | [-0.9; 1.9]  |
| 30–31 weeks                                                       | Ref.                                                                                                   |              | Ref.                                                                                                      |              |
| <b>Small for gestational age</b>                                  |                                                                                                        |              |                                                                                                           |              |
| <3rd percentile                                                   | -0.0                                                                                                   | [-3.0; 3.0]  | 0.2                                                                                                       | [-1.9; 2.3]  |
| 3rd–9th percentile                                                | Ref.                                                                                                   |              | Ref.                                                                                                      |              |
| ≥10th percentile                                                  | -0.6                                                                                                   | [-2.9; 1.7]  | -0.7                                                                                                      | [-2.5; 1.2]  |
| <b>At least one child had a BPD</b>                               |                                                                                                        |              |                                                                                                           |              |
| No                                                                | Ref.                                                                                                   |              | Ref.                                                                                                      |              |

| Multilevel multivariate linear regression*                                          | A) Excluding 89 mothers<br>with at least one child dead<br>before two years of age,<br>whole sample ** |               | B) Excluding 89 mothers<br>with at least one child dead<br>before two years of age,<br>without France *** |              |
|-------------------------------------------------------------------------------------|--------------------------------------------------------------------------------------------------------|---------------|-----------------------------------------------------------------------------------------------------------|--------------|
|                                                                                     | Coef.                                                                                                  | [95% CI]      | Coef.                                                                                                     | [95% CI]     |
| Yes                                                                                 | -0.2                                                                                                   | [-1.8; 1.5]   | -0.9                                                                                                      | [-0.9; 2.7]  |
| <b>At least one child had a congenital anomaly</b>                                  |                                                                                                        |               |                                                                                                           |              |
| No                                                                                  | Ref.                                                                                                   |               | Ref.                                                                                                      |              |
| Yes                                                                                 | 0.7                                                                                                    | [-1.9; 3.4]   | -1.2                                                                                                      | [-3.2; 0.7]  |
| <b>At least one child had any severe non-respiratory morbidity at discharge****</b> |                                                                                                        |               |                                                                                                           |              |
| No                                                                                  | Ref.                                                                                                   |               | Ref.                                                                                                      |              |
| Yes                                                                                 | -2.5                                                                                                   | [-5.7; 0.6]   | -0.6                                                                                                      | [-2.6; 1.5]  |
| <b>Sociodemographic characteristics</b>                                             |                                                                                                        |               |                                                                                                           |              |
| <b>Maternal age at childbirth</b>                                                   |                                                                                                        |               |                                                                                                           |              |
| <25 years                                                                           | -0.9                                                                                                   | [-2.4; 0.5]   | -1.6                                                                                                      | [-3.6; 0.3]  |
| 25–34 years                                                                         | Ref.                                                                                                   |               | Ref.                                                                                                      |              |
| ≥35 years                                                                           | -1.3                                                                                                   | [-3.0; 0.4]   | -1.7                                                                                                      | [-2.9; -0.4] |
| <b>Maternal country of birth</b>                                                    |                                                                                                        |               |                                                                                                           |              |
| Native born                                                                         | Ref.                                                                                                   |               | Ref.                                                                                                      |              |
| Other European country                                                              | -0.7                                                                                                   | [-3.6; 2.1]   | -0.1                                                                                                      | [-2.2; 2.4]  |
| Non-European country                                                                | -1.3                                                                                                   | [-3.9; 1.4]   | -2.3                                                                                                      | [-4.0; -0.5] |
| <b>Maternal educational level</b>                                                   |                                                                                                        |               |                                                                                                           |              |
| Low (ISCED 0-2)                                                                     | -1.3                                                                                                   | [-3.5; 0.9]   | -1.0                                                                                                      | [-2.7; 0.7]  |
| Intermediate (ISCED 3-5)                                                            | Ref.                                                                                                   |               | Ref.                                                                                                      |              |
| High (ISCED 6-8)                                                                    | -0.1                                                                                                   | [-1.3; 1.2]   | -0.0                                                                                                      | [-1.3; 1.3]  |
| <b>Parental cohabiting status</b>                                                   |                                                                                                        |               |                                                                                                           |              |
| Single/Other                                                                        | -5.8                                                                                                   | [-8.4; -3.2]  | -4.5                                                                                                      | [-6.3; -2.7] |
| Married/Couple/Cohabiting                                                           | Ref.                                                                                                   |               | Ref.                                                                                                      |              |
| <b>Household unemployment situation</b>                                             |                                                                                                        |               |                                                                                                           |              |
| Employed (part-/fulltime)/Other*****                                                | Ref.                                                                                                   |               | Ref.                                                                                                      |              |
| At least one parent unemployed                                                      | -1.6                                                                                                   | [-2.8; -0.5]  | -2.9                                                                                                      | [-4.8; -1.0] |
| <b>Child's health and developmental characteristics at five years</b>               |                                                                                                        |               |                                                                                                           |              |
| <b>Sensory impairment</b>                                                           |                                                                                                        |               |                                                                                                           |              |
| None/mild                                                                           | Ref.                                                                                                   |               | Ref.                                                                                                      |              |
| Moderate/severe                                                                     | -6.1                                                                                                   | [-9.2; -3.1]  | -5.0                                                                                                      | [-8.0; -2.1] |
| <b>Cerebral palsy</b>                                                               |                                                                                                        |               |                                                                                                           |              |
| No                                                                                  | Ref.                                                                                                   |               | Ref.                                                                                                      |              |
| Yes                                                                                 | -1.0                                                                                                   | [-3.4; 1.3]   | -1.1                                                                                                      | [-3.8; 1.5]  |
| <b>Autism</b>                                                                       |                                                                                                        |               |                                                                                                           |              |
| No                                                                                  | Ref.                                                                                                   |               | Ref.                                                                                                      |              |
| Yes                                                                                 | -6.4                                                                                                   | [-11.0; -1.8] | -5.9                                                                                                      | [-9.4; -2.4] |
| <b>Epilepsy</b>                                                                     |                                                                                                        |               |                                                                                                           |              |
| No                                                                                  | Ref.                                                                                                   |               | Ref.                                                                                                      |              |

| Multilevel multivariate linear regression*           | A) Excluding 89 mothers<br>with at least one child dead<br>before two years of age,<br>whole sample ** |              | B) Excluding 89 mothers<br>with at least one child dead<br>before two years of age,<br>without France *** |              |
|------------------------------------------------------|--------------------------------------------------------------------------------------------------------|--------------|-----------------------------------------------------------------------------------------------------------|--------------|
|                                                      | Coef.                                                                                                  | [95% CI]     | Coef.                                                                                                     | [95% CI]     |
| Yes                                                  | -3.7                                                                                                   | [-7.2; -0.2] | -2.3                                                                                                      | [-6.7; 2.1]  |
| <b>Developmental delay</b>                           |                                                                                                        |              |                                                                                                           |              |
| No                                                   |                                                                                                        |              | Ref.                                                                                                      |              |
| Yes                                                  |                                                                                                        |              | -1.6                                                                                                      | [-4.7; 1.5]  |
| <b>Speech delay</b>                                  |                                                                                                        |              |                                                                                                           |              |
| No                                                   |                                                                                                        |              | Ref.                                                                                                      |              |
| Yes                                                  |                                                                                                        |              | 1.8                                                                                                       | [-1.6; 5.1]  |
| <b>ADHD</b>                                          |                                                                                                        |              |                                                                                                           |              |
| No                                                   |                                                                                                        |              | Ref.                                                                                                      |              |
| Yes                                                  |                                                                                                        |              | -5.1                                                                                                      | [-9.4; -0.7] |
| <b>At least one of developmental or speech delay</b> |                                                                                                        |              |                                                                                                           |              |
| No                                                   |                                                                                                        |              | Ref.                                                                                                      |              |
| Yes                                                  |                                                                                                        |              | -2.1                                                                                                      | [-6.1; 1.9]  |

Abbreviations: ISCED, International Standard Classification of Education. HELLP, Hemolysis, Elevated Liver enzymes, and Low Platelets. BPD, bronchopulmonary dysplasia. ADHD, attention deficit hyperactivity disorder. \* with IPW; \*\* with France; \*\*\* without France; \*\*\*\* defined as at least one of intraventricular haemorrhage grade III or IV, cystic periventricular leukomalacia, ROP stages III to V, or necrotising enterocolitis requiring surgery or peritoneal drainage; \*\*\*\*\* other situations included student, parental leave, home parents, and other.
